# Supplementary material
Source: publisher figshare collection journal article supplement (https://acs.figshare.com/ndownloader/files/4600402)
Supplement: Supplementary file 1 [file 4600402]

## Supporting Information for:

### Birnessite-type MnO<sub>2</sub> Nanowalls and Their Magnetic Properties

H. T. Zhu,<sup>†,‡</sup> J. Luo,<sup>†,\*</sup> H. X. Yang,<sup>†</sup> J. K. Liang,<sup>†,§</sup> G. H. Rao,<sup>†</sup> J. B. Li,<sup>†</sup> Z. M. Du<sup>‡</sup>

<sup>†</sup> Beijing National Laboratory for Condensed Matter Physics, Institute of Physics, Chinese Academy of Sciences, Beijing 100080, China, <sup>‡</sup> Department of Materials Science and Engineering, University of Science and Technology Beijing, Beijing 100083, China, and <sup>§</sup> International Center for Materials Physics, Chinese Academy of Sciences, Shenyang 110016, China

\*Corresponding author. E-mail: (J.L.) jluo@aphy.iphy.ac.cn.

## Contents

### S1. In situ temperature dependent XRD study of the birnessite-type MnO<sub>2</sub> sample

### S2. SEM images of the birnessite-type MnO<sub>2</sub> nanowalls with a reaction time of 60 minutes

#### S1. In situ temperature dependent XRD study of the birnessite-type MnO<sub>2</sub> sample

The in situ temperature dependent XRD study of the birnessite-type MnO<sub>2</sub> powder sample was performed on a Philips X'pert Pro diffractometer with Cu K $\alpha$ 1 radiation in a continuous-scan mode. As shown in Figure S1a, the birnessite-type MnO<sub>2</sub> structure is stable below 350 °C. The layered MnO<sub>2</sub> transforms into the  $\alpha$ -MnO<sub>2</sub> phase between 350 °C and 500 °C, which agrees well with our TGA analysis. Figure S1b shows that the position of the (001) diffraction peak varies with the temperature. The  $d_{001}$  value decreases from 0.72 nm at 30 °C to 0.68 nm at 350 °C, which is related to the loss of the interlayer water with increasing temperature.

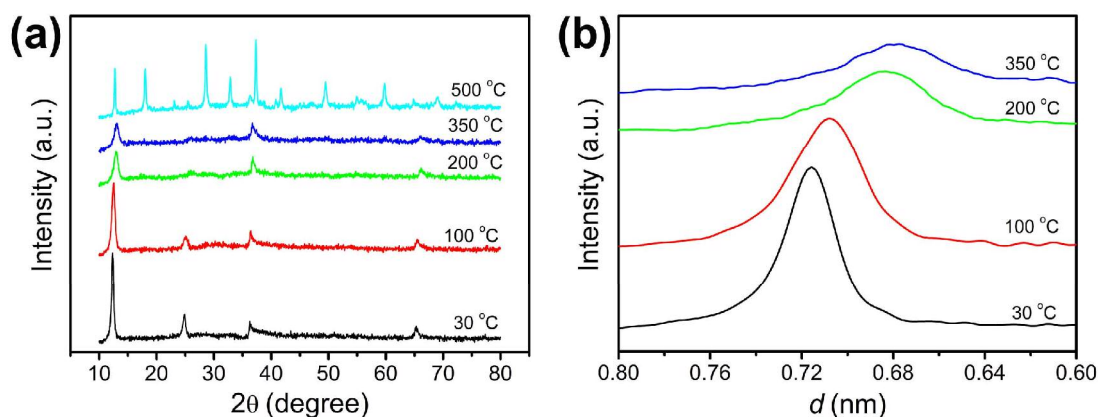

Figure S1 Temperature dependent XRD patterns of the birnessite-type MnO<sub>2</sub> powder sample

#### S2. SEM images of the birnessite-type MnO<sub>2</sub> nanowalls with a reaction time of 60 minutes

Figure S2 show the SEM images of the birnessite-type MnO<sub>2</sub> nanowalls with shorter reaction time (60 min). The distribution of the nanowalls is uniform (figure S2a). The difference is that the

flakes are much sparser and thinner than those of the sample with a reaction time of 100 min, indicating that the dimension and morphology of the nanowalls are adjustable by controlling the reaction conditions.

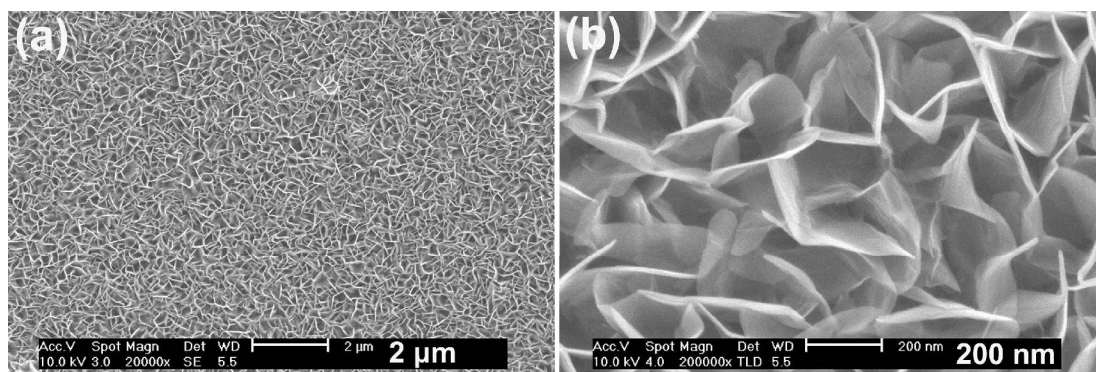

Figure S2 (a) Low- and (b) high-magnification SEM images of the birnessite-type  $\text{MnO}_2$  nanowalls with a reaction time of 60 min.
